# Supplementary material for: A conserved two-step binding for the UAF1 regulator to the USP12 deubiquitinating enzyme
Source: PubMed Central journal article supplement — J Struct Biol. 2016 Dec;196(3):437–47. doi: 10.1016/j.jsb.2016.09.011 (PMC5131612; doi:10.1016/j.jsb.2016.09.011), 2016-12
Supplement: mmc1.pdf [file mmc1.pdf]

### Supplementary Figure 1

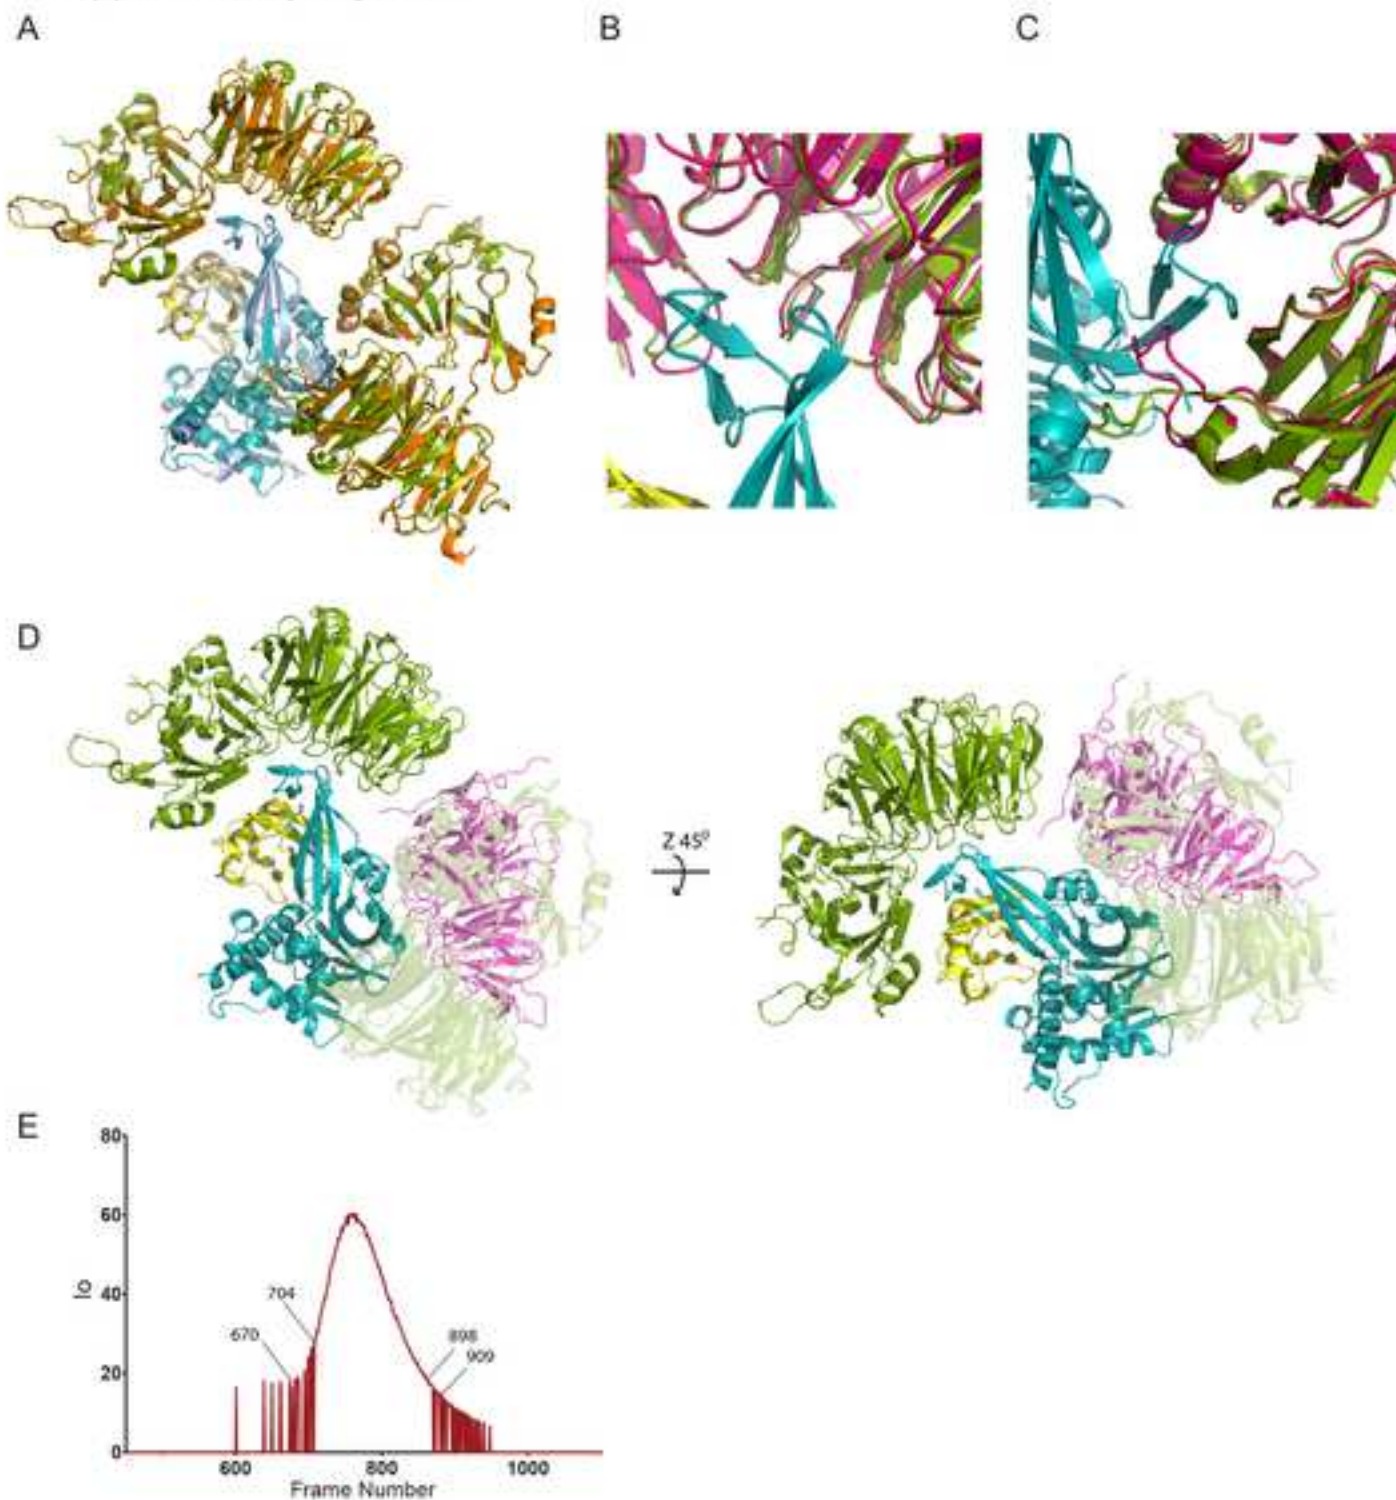

Supplementary Fig.1A) Superposition of USP12-Ub/UAF1 (colours as indicated earlier) with USP46-Ub/UAF1 (Colours ; USP46 - as in Fig.1b, Ubiquitin - Light Brown, UAF1 - Orange) (PDB code - 5CVN). B,C) Superposition of free UAF1<sub>580</sub> (Dark Pink) on USP12<sub>F1</sub>-Ub/UAF1<sub>580</sub> (UAF1<sub>580</sub> in green) structure at Interface 1 and 2 respectively. D) Superposition of WDR20 (Dark pink) with UAF1<sub>580</sub> (light green) bound at Interface 2 on USP12-Ub/UAF1<sub>580</sub> (colours as indicated earlier). E) I<sub>0</sub> is plotted on the y-axis against the corresponding frame number on the x-axis, frames 670-704 and 898-909 were analysed separately for the high molecular weight species and the 1:2 complex respectively.
